# Supplementary material for: Constraining regional glacier reconstructions using past ice thickness of deglaciating areas – a case study in the European Alps
Source: Copernicus journal article supplement (doi:10.5194/tc-17-2285-2023), 2023-06-08
Supplement: Supplementary file 1 [file tc-17-2285-2023-supplement.pdf]

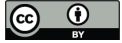

*Supplement of*

## **Constraining regional glacier reconstructions using past ice thickness of deglaciating areas – a case study in the European Alps**

**Christian Sommer et al.**

*Correspondence to:* Christian Sommer ([chris.sommer@fau.de](mailto:chris.sommer@fau.de))

The copyright of individual parts of the supplement might differ from the article licence.

**Table of contents**

|            |                                                                           |    |
|------------|---------------------------------------------------------------------------|----|
| Table S 1  | List of Calibration glaciers sample.....                                  | 2  |
| Table S 2  | List of Validation glaciers sample.....                                   | 6  |
| Figure S 1 | Spatial distribution of glaciers with in-situ thickness observations..... | 10 |
| Figure S 2 | Topographic distribution of in-situ thickness observations.....           | 10 |
| Figure S 3 | Reference ice thickness maps.....                                         | 11 |
|            | References.....                                                           | 12 |

Table S 1 Calibration glaciers with in-situ thickness observations in the Swiss and Austrian Alps. Lat/Long coordinates indicate center coordinates of respective glacier polygons.  $N_{in-situ}$  shows the number of thickness observations per glacier (selected by 30m circular buffer). Original ID refers to IDs of the Swiss (Müller et al., 1976; Maisch et al., 2000) and Austrian (Patzelt, 1980) inventories while RGIId is the respective glacier ID of the Randolph Glacier Inventory (Pfeffer et al., 2014).

|    | <i>Long</i> | <i>Lat</i> | <i>Area [km<sup>2</sup>]</i> | <i>N<sub>in-situ</sub></i> | <i>Original ID</i>             | <i>RGIId</i>   |
|----|-------------|------------|------------------------------|----------------------------|--------------------------------|----------------|
| 1  | 9.0222      | 47.0085    | 0.19                         | 12                         | A50j-13                        | RGI60-11.00536 |
| 2  | 9.3907      | 46.9619    | 0.29                         | 81                         | A50d-1                         | RGI60-11.00638 |
| 3  | 10.1636     | 46.8485    | 0.29                         | 4                          | E52-2/13019                    | RGI60-11.00781 |
| 4  | 8.8549      | 46.8434    | 0.4                          | 25                         | A50j-5/A50j-7/A51d-10          | RGI60-11.00857 |
| 5  | 8.9345      | 46.7923    | 0.29                         | 26                         | A14m-5                         | RGI60-11.00995 |
| 6  | 8.8392      | 46.7904    | 0.54                         | 41                         | A14l-11                        | RGI60-11.00998 |
| 7  | 8.7728      | 46.7507    | 0.52                         | 34                         | A51d-18/A51d-15                | RGI60-11.01104 |
| 8  | 8.4206      | 46.6876    | 0.29                         | 3                          | A51f-16/A54e-12                | RGI60-11.01144 |
| 9  | 8.9607      | 46.6354    | 0.65                         | 29                         | A14f-12                        | RGI60-11.01266 |
| 10 | 8.6114      | 46.6065    | 0.27                         | 52                         | A51e-10                        | RGI60-11.01344 |
| 11 | 8.602       | 46.5995    | 0.44                         | 51                         | A51e-12                        | RGI60-11.01367 |
| 12 | 8.6137      | 46.5966    | 0.18                         | 6                          | A51e-8                         | RGI60-11.01376 |
| 13 | 7.9976      | 46.5735    | 0.16                         | 10                         | A54m-25                        | RGI60-11.01421 |
| 14 | 7.8938      | 46.4768    | 0.61                         | 6                          | B31-2                          | RGI60-11.01770 |
| 15 | 7.7834      | 46.4545    | 0.43                         | 23                         | A55b-13/A55b-30/B30-15/A55b-14 | RGI60-11.01848 |
| 16 | 9.8894      | 46.426     | 0.36                         | 38                         | E23-2                          | RGI60-11.01945 |
| 17 | 9.8255      | 46.421     | 0.48                         | 24                         | E24-5/E23-18                   | RGI60-11.01962 |
| 18 | 8.3091      | 46.4336    | 0.23                         | 1                          | B45-4/B45-35                   | RGI60-11.01876 |
| 19 | 9.942       | 46.3984    | 0.61                         | 21                         | E22-3                          | RGI60-11.02069 |
| 20 | 7.5533      | 46.42      | 0.6                          | 50                         | A55d-5                         | RGI60-11.01949 |
| 21 | 7.852       | 46.4053    | 0.36                         | 10                         | B32-4/B34-2/B32-5/B32-6        | RGI60-11.02006 |
| 22 | 7.3794      | 46.3603    | 0.68                         | 57                         | B23-3/A55f-11                  | RGI60-11.02187 |
| 23 | 8.0431      | 46.1278    | 0.53                         | 28                         | C01-3                          | RGI60-11.02552 |
| 24 | 7.6861      | 46.1258    | 0.31                         | 19                         | B60-9/B62-28                   | RGI60-11.02549 |
| 25 | 7.7072      | 46.074     | 0.32                         | 11                         | B58-27/B58-2/B58-26            | RGI60-11.02635 |
| 26 | 7.6091      | 46.065     | 0.08                         | 1                          | B64-2/B63-23/B72-6             | RGI60-11.02584 |
| 27 | 7.4428      | 46.0557    | 0.65                         | 20                         | B73-24                         | RGI60-11.02663 |
| 28 | 7.868       | 46.048     | 0.07                         | 7                          | B55-16                         | RGI60-11.02695 |
| 29 | 7.9175      | 46.0256    | 0.29                         | 10                         | B52-29/B52-26                  | RGI60-11.02704 |
| 30 | 7.4614      | 45.9941    | 0.33                         | 8                          | B73-16/B73-15/B73-34           | RGI60-11.02755 |
| 31 | 9.7009      | 46.5394    | 0.58                         | 29                         | A12i-3/E35-26/E35-18           | RGI60-11.01516 |
| 32 | 7.3222      | 46.0868    | 0.47                         | 21                         | B75-9                          | RGI60-11.02599 |
| 33 | 9.8244      | 46.4162    | 0.25                         | 35                         | E24-5/E23-18                   | RGI60-11.01962 |
| 34 | 9.7258      | 46.5121    | 0.55                         | 31                         | E35-15/E35-13                  | RGI60-11.01607 |
| 35 | 10.7818     | 46.9089    | 0.57                         | 7                          | 14018/7015                     | RGI60-11.00677 |
| 36 | 11.115      | 47.0747    | 0.42                         | 4                          | 3058/3060/1002                 | RGI60-11.00295 |
| 37 | 11.0303     | 47.104     | 0.46                         | 1                          | 2009/2008/2007                 | RGI60-11.00221 |
| 38 | 12.4109     | 47.0504    | 0.25                         | 22                         | 6058                           | RGI60-11.00319 |
| 39 | 9.1717      | 46.8766    | 1.4                          | 67                         | A14p-1/A50h-3                  | RGI60-11.00752 |
| 40 | 8.8201      | 46.8349    | 0.89                         | 49                         | A51c-2                         | RGI60-11.00881 |

|    |         |         |      |     |                                              |                |
|----|---------|---------|------|-----|----------------------------------------------|----------------|
| 41 | 8.7885  | 46.8125 | 1.13 | 102 | A51d-6/A51c-8                                | RGI60-11.00924 |
| 42 | 8.9199  | 46.7932 | 0.7  | 60  | A14l-22                                      | RGI60-11.00988 |
| 43 | 8.4308  | 46.7804 | 1.01 | 21  | A51h-15/A51h-25                              | RGI60-11.01019 |
| 44 | 10.0056 | 46.6999 | 1.55 | 93  | E44-4                                        | RGI60-11.01165 |
| 45 | 9.0631  | 46.5233 | 1.64 | 107 | A14d-10/A14d-9/A14d-15                       | RGI60-11.01557 |
| 46 | 9.7111  | 46.5143 | 0.85 | 37  | E35-15/E35-13                                | RGI60-11.01603 |
| 47 | 9.0321  | 46.4971 | 0.86 | 25  | C44-2/A14d-17/A13n-6                         | RGI60-11.01635 |
| 48 | 7.8598  | 46.4731 | 1.31 | 137 | A54m-19/B30-22/B30-19                        | RGI60-11.01678 |
| 49 | 7.7885  | 46.4472 | 1.15 | 74  | A55b-13/B30-16/A55b-30/B30-15/A55b-31/B30-12 | RGI60-11.01857 |
| 50 | 9.8908  | 46.4184 | 1.02 | 131 | E23-3                                        | RGI60-11.01968 |
| 51 | 9.8954  | 46.4085 | 0.78 | 56  | E23-4/E22-15                                 | RGI60-11.02011 |
| 52 | 7.7092  | 46.4226 | 0.92 | 5   | A55b-16/B30-4                                | RGI60-11.01928 |
| 53 | 9.9935  | 46.3932 | 1.72 | 123 | C93-9/C93-8                                  | RGI60-11.02075 |
| 54 | 7.5656  | 46.387  | 0.79 | 88  | A55c-11                                      | RGI60-11.02095 |
| 55 | 7.3718  | 46.3639 | 0.75 | 78  | A56d-1/B23-3/A55f-11                         | RGI60-11.02168 |
| 56 | 7.2117  | 46.328  | 0.69 | 95  | B16-1/B22-1                                  | RGI60-11.02244 |
| 57 | 7.2026  | 46.3094 | 1.04 | 5   | B22-1/B16-9/B21-5                            | RGI60-11.02249 |
| 58 | 7.8419  | 46.0891 | 1.42 | 124 | B55-8/B55-9                                  | RGI60-11.02607 |
| 59 | 7.8355  | 46.0831 | 1.25 | 101 | B55-9                                        | RGI60-11.02627 |
| 60 | 7.8536  | 46.0721 | 0.99 | 109 | B53-4/B55-12/B55-11                          | RGI60-11.02596 |
| 61 | 7.4701  | 45.9973 | 1.47 | 123 | B73-15/B73-34/B73-33                         | RGI60-11.02771 |
| 62 | 7.0498  | 45.9486 | 1.29 | 4   | B85-16/B85-26/B85-8/B85-7                    | RGI60-11.02793 |
| 63 | 7.0621  | 45.9197 | 1.71 | 13  | B85-7/B85-4                                  | RGI60-11.02909 |
| 64 | 9.2568  | 46.9154 | 0.84 | 28  | A15b-4/A14p-3                                | RGI60-11.00689 |
| 65 | 9.0832  | 46.482  | 1.09 | 6   | A13n-4/C45-3/C51-2                           | RGI60-11.01766 |
| 66 | 9.1012  | 46.4841 | 1.43 | 12  | A13n-2/A13n-4                                | RGI60-11.01769 |
| 67 | 8.0183  | 46.0828 | 1.22 | 69  | B52-6/B52-46                                 | RGI60-11.02628 |
| 68 | 7.6581  | 46.029  | 1.29 | 60  | B57-10/B57-11/B57-12                         | RGI60-11.02726 |
| 69 | 9.1688  | 46.8822 | 1.19 | 41  | A14p-1                                       | RGI60-11.00752 |
| 70 | 13.6338 | 47.4703 | 0.86 | 74  | 11001/11002                                  | RGI60-11.00006 |
| 71 | 10.9286 | 46.9189 | 1.32 | 48  | 2143                                         | RGI60-11.00674 |
| 72 | 11.1151 | 46.9734 | 0.71 | 26  | 2039/2037                                    | RGI60-11.00584 |
| 73 | 11.1129 | 46.9849 | 1.72 | 39  | 3035/3036                                    | RGI60-11.00518 |
| 74 | 11.1017 | 46.9917 | 1.47 | 42  | 3035/3036/2022                               | RGI60-11.00518 |
| 75 | 11.1119 | 47.0276 | 0.7  | 2   | 2018                                         | RGI60-11.00450 |
| 76 | 11.672  | 47.0541 | 1.22 | 41  | 3002/9097/9110                               | RGI60-11.00311 |
| 77 | 8.9916  | 47.0021 | 2.1  | 112 | A50k-4/A50k-3                                | RGI60-11.00539 |
| 78 | 10.0751 | 46.8526 | 3.25 | 134 | A10g-5/E50-7/12008                           | RGI60-11.00804 |
| 79 | 8.9794  | 46.8134 | 2.35 | 129 | A50i-6                                       | RGI60-11.00915 |
| 80 | 8.405   | 46.7019 | 2.25 | 89  | A54e-13/A54e-19/A51f-15/A54e-12              | RGI60-11.01144 |
| 81 | 8.1277  | 46.6438 | 1.87 | 68  | A54j-2/A54j-3/A54j-8                         | RGI60-11.01222 |
| 82 | 8.9333  | 46.6272 | 1.77 | 17  | A14f-15/A14g-2/A14f-20/C42-3                 | RGI60-11.01268 |
| 83 | 7.9713  | 46.5547 | 1.98 | 88  | A54m-5/B36-26/A54m-6/A54m-27                 | RGI60-11.01445 |
| 84 | 7.954   | 46.5478 | 2.13 | 46  | A54m-5/A54m-6/A54m-7                         | RGI60-11.01462 |
| 85 | 9.1404  | 46.5353 | 2    | 82  | A14c-3/A14d-3                                | RGI60-11.01527 |
| 86 | 7.9056  | 46.4772 | 1.85 | 50  | A54m-15/A54m-17/B31-2/B31-3                  | RGI60-11.01729 |

|     |         |         |       |      |                                                          |                |
|-----|---------|---------|-------|------|----------------------------------------------------------|----------------|
| 87  | 7.8445  | 46.469  | 1.78  | 144  | B30-22/B30-19/B30-18                                     | RGI60-11.01702 |
| 88  | 7.825   | 46.4618 | 2.3   | 259  | A55b-13/B30-19/B30-18/B30-16                             | RGI60-11.01702 |
| 89  | 8.4812  | 46.4161 | 2.32  | 159  | C14-11/C14-10                                            | RGI60-11.01952 |
| 90  | 7.8936  | 46.4063 | 1.94  | 84   | B32-9/B34-3                                              | RGI60-11.01986 |
| 91  | 7.5459  | 46.4016 | 3.34  | 210  | A55c-25/A55f-7/A55c-13                                   | RGI60-11.01990 |
| 92  | 9.6134  | 46.2993 | 1.87  | 119  | C85-6/C84-17                                             | RGI60-11.02293 |
| 93  | 7.8466  | 46.1074 | 3.45  | 310  | B55-4/B55-5/B55-7                                        | RGI60-11.02569 |
| 94  | 7.8366  | 46.0977 | 2.17  | 138  | B55-4/B55-7                                              | RGI60-11.02569 |
| 95  | 7.4391  | 46.0746 | 1.89  | 74   | B73-26/B74-1/B73-38/B73-37                               | RGI60-11.02623 |
| 96  | 7.9148  | 46.055  | 2.39  | 68   | B53-4/B52-32                                             | RGI60-11.02624 |
| 97  | 10.0934 | 46.839  | 2.12  | 6    | A10g-5/A10g-8/E50-7/E51-3                                | RGI60-11.00804 |
| 98  | 9.9777  | 46.6958 | 3.24  | 158  | E45-8                                                    | RGI60-11.01165 |
| 99  | 8.0838  | 46.2494 | 2.01  | 108  | B47-4                                                    | RGI60-11.02366 |
| 100 | 7.6891  | 46.0332 | 2.15  | 96   | B57-14/B57-23                                            | RGI60-11.02718 |
| 101 | 13.6161 | 47.4826 | 3.35  | 99   | 11001/11002                                              | RGI60-11.00002 |
| 102 | 10.8619 | 46.7756 | 2.82  | 41   | 2111/2110                                                | RGI60-11.00992 |
| 103 | 10.7958 | 46.8913 | 2.5   | 15   | 14016/2133/14015                                         | RGI60-11.00697 |
| 104 | 10.867  | 46.9214 | 1.83  | 15   | 14010/14008                                              | RGI60-11.00670 |
| 105 | 10.9331 | 46.9342 | 1.83  | 100  | 2144/14007/2150                                          | RGI60-11.00648 |
| 106 | 10.7131 | 46.8551 | 2.9   | 38   | 7022/7023                                                | RGI60-11.00746 |
| 107 | 10.1056 | 46.8519 | 2.59  | 37   | A10g-5/12008                                             | RGI60-11.00797 |
| 108 | 11.1347 | 46.9786 | 1.94  | 92   | 3034                                                     | RGI60-11.00541 |
| 109 | 11.1285 | 47.0455 | 3.7   | 40   | 3055                                                     | RGI60-11.00376 |
| 110 | 11.0758 | 47.0735 | 2.35  | 30   | 2012                                                     | RGI60-11.00323 |
| 111 | 11.1218 | 47.0845 | 3.28  | 38   | 3060/1002                                                | RGI60-11.00295 |
| 112 | 12.3587 | 47.0943 | 3.63  | 44   | 6054/6053/6077/5123                                      | RGI60-11.00135 |
| 113 | 12.3708 | 47.1269 | 2.47  | 31   | 6077/6078/6079/5123                                      | RGI60-11.00068 |
| 114 | 11.8198 | 46.9987 | 3.06  | 35   | 9076/9074/9075                                           | RGI60-11.00459 |
| 115 | 8.8964  | 46.8426 | 5.82  | 343  | A50i-19/A51d-10                                          | RGI60-11.00817 |
| 116 | 8.8532  | 46.8185 | 13.77 | 574  | A50i-19/A51c-2/A50j-7/A51d-10/A50i-18                    | RGI60-11.00857 |
| 117 | 8.1501  | 46.6448 | 6.14  | 294  | A54j-2/A54j-3/A54i-22/A54i-10/A54i-4/A54i-5              | RGI60-11.01222 |
| 118 | 7.9459  | 46.5186 | 4.21  | 112  | B36-26/A54m-12/A54m-39                                   | RGI60-11.01450 |
| 119 | 7.9312  | 46.4722 | 9.52  | 693  | B36-26/A54m-15/B31-4/A54m-44                             | RGI60-11.01450 |
| 120 | 7.9592  | 46.4345 | 21.61 | 2018 | B36-26/B31-6/B36-1/B31-25/B34-7/B36-35/B35-1             | RGI60-11.01450 |
| 121 | 9.8842  | 46.3895 | 7.03  | 325  | E23-6/E23-9                                              | RGI60-11.01946 |
| 122 | 7.5118  | 46.3841 | 9.09  | 1371 | A55f-3/B24-4/B23-9                                       | RGI60-11.02072 |
| 123 | 9.7022  | 46.3117 | 8.87  | 348  | C83-12                                                   | RGI60-11.02245 |
| 124 | 7.7329  | 46.1093 | 4.8   | 218  | B60-9/B58-8/B58-6                                        | RGI60-11.02507 |
| 125 | 7.6779  | 46.0819 | 6.35  | 278  | B62-10/B58-2/B63-13/B63-5                                | RGI60-11.02593 |
| 126 | 7.8725  | 46.0359 | 5.32  | 381  | B53-4/B52-29/B55-18/B56-13                               | RGI60-11.02624 |
| 127 | 7.5482  | 46.0076 | 11.09 | 215  | B72-15/B72-11/B72-16/B72-12/B57-5                        | RGI60-11.02709 |
| 128 | 7.5801  | 46.0118 | 9.9   | 217  | B72-15/B72-11/B72-10/B57-5                               | RGI60-11.02709 |
| 129 | 7.9282  | 46.0079 | 5.48  | 465  | B52-24/B52-22                                            | RGI60-11.02746 |
| 130 | 7.4226  | 46.0039 | 4.55  | 354  | B74-8/B73-16/B82-14/B82-19                               | RGI60-11.02749 |
| 131 | 7.87    | 45.9972 | 18.61 | 1499 | B52-29/B56-3/B52-80/B56-4/B56-7                          | RGI60-11.02704 |
| 132 | 7.2917  | 45.9661 | 17.79 | 1132 | B83-3/B83-9/B83-10/B83-6/B84-2/B84-4/B82-64/B82-40/B84-8 | RGI60-11.02766 |

|     |         |         |       |      |                                                                               |                |
|-----|---------|---------|-------|------|-------------------------------------------------------------------------------|----------------|
| 133 | 7.3886  | 45.992  | 5.85  | 520  | B74-8/B82-14/B74-25                                                           | RGI60-11.02774 |
| 134 | 7.4195  | 45.9699 | 9.96  | 419  | B74-8/B73-16/B82-19/B82-18/B82-23                                             | RGI60-11.02749 |
| 135 | 7.4503  | 45.9507 | 16.64 | 515  | B73-16/B73-14/B82-27/B73-33                                                   | RGI60-11.02755 |
| 136 | 7.5237  | 45.9698 | 5.81  | 236  | B73-14/B73-12                                                                 | RGI60-11.02787 |
| 137 | 7.6881  | 45.9697 | 5.37  | 103  | B56-31/B56-30                                                                 | RGI60-11.02819 |
| 138 | 8.3956  | 46.622  | 17.44 | 1741 | A54e-23/A54e-24/B43-3/A54f-7                                                  | RGI60-11.01198 |
| 139 | 8.1184  | 46.6143 | 9.42  | 238  | A54j-2/A54l-23/A54l-4/A54i-5/A54g-11                                          | RGI60-11.01222 |
| 140 | 8.0991  | 46.5637 | 8.67  | 152  | A54l-19/A54l-27/A54l-55/A54l-56/A54l-32/A54l-29/A54l-33/A54g-11/A54l-31/B40-7 | RGI60-11.01328 |
| 141 | 8.1228  | 46.5156 | 32.65 | 650  | B36-26/A54l-35/A54g-3/A54g-49/B36-52/B40-6/A54g-11/A54l-31/B40-7              | RGI60-11.01328 |
| 142 | 9.0588  | 46.4893 | 4.57  | 102  | C44-2/C45-2/A14d-17/A13n-6                                                    | RGI60-11.01635 |
| 143 | 7.8018  | 45.951  | 57.75 | 1397 | B56-3/B56-30/B56-7/B56-24                                                     | RGI60-11.02819 |
| 144 | 8.4333  | 46.6988 | 6.56  | 266  | A54e-13/A51f-16/A54e-12                                                       | RGI60-11.01144 |
| 145 | 12.6994 | 47.0973 | 19.9  | 148  | 4026/6110/6108/6107/4028/5093/4027/5051/5073                                  | RGI60-11.00067 |
| 146 | 10.7573 | 46.8499 | 17.95 | 300  | 2127/7022/2128/2129/2132/7023                                                 | RGI60-11.00719 |
| 147 | 10.9889 | 46.7882 | 11.17 | 88   | 2107/2075/2072/2074                                                           | RGI60-11.00887 |
| 148 | 10.7919 | 46.8416 | 4.16  | 173  | 7022/2128/2129/2132                                                           | RGI60-11.00746 |
| 149 | 10.8516 | 46.896  | 6.67  | 84   | 2135/2136/14013/14008/2133/14015/14014                                        | RGI60-11.00666 |
| 150 | 10.1609 | 46.8588 | 4.14  | 52   | E52-2/12007/12006/13017/13019/13020                                           | RGI60-11.00778 |
| 151 | 11.1602 | 46.9739 | 4.76  | 23   | 2040/3032                                                                     | RGI60-11.00541 |
| 152 | 11.8563 | 47.0153 | 4.69  | 57   | 9073/9064                                                                     | RGI60-11.00399 |

Table S 2 Validation glaciers with in-situ thickness observations in the Swiss and Austrian Alps. Lat/Long coordinates indicate center coordinates of respective glacier polygons.  $N_{in-situ}$  shows the number of thickness observations per glacier (selected by 30m circular buffer). Original ID refers to IDs of the Swiss (Müller et al., 1976; Maisch et al., 2000) and Austrian (Patzelt, 1980) inventories while RGIId is the respective glacier ID of the Randolph Glacier Inventory (Pfeffer et al., 2014).

|    | <i>Long</i> | <i>Lat</i> | <i>Area [km<sup>2</sup>]</i> | <i>N<sub>in-situ</sub></i> | <i>Original ID</i>            | <i>RGIId</i>   |
|----|-------------|------------|------------------------------|----------------------------|-------------------------------|----------------|
| 1  | 8.8263      | 46.8211    | 0.36                         | 15                         | A51d-8                        | RGI60-11.00907 |
| 2  | 8.9136      | 46.8186    | 0.37                         | 14                         | A50i-17                       | RGI60-11.00920 |
| 3  | 8.9059      | 46.8157    | 0.55                         | 8                          | A50i-17                       | RGI60-11.00930 |
| 4  | 8.923       | 46.8141    | 0.4                          | 37                         | A50i-12/A50i-13               | RGI60-11.00931 |
| 5  | 8.9178      | 46.8137    | 0.04                         | 5                          | A50i-12/A50i-13               | RGI60-11.00931 |
| 6  | 8.9269      | 46.8091    | 0.21                         | 19                         | A50i-13                       | RGI60-11.00931 |
| 7  | 8.9669      | 46.801     | 0.67                         | 60                         | A14n-5                        | RGI60-11.00976 |
| 8  | 9.9361      | 46.6905    | 0.28                         | 9                          | E42-8                         | RGI60-11.01182 |
| 9  | 8.9746      | 46.6355    | 0.49                         | 38                         | A14f-11                       | RGI60-11.01263 |
| 10 | 9.6899      | 46.548     | 0.19                         | 17                         | A12i-4/A12j-2                 | RGI60-11.01497 |
| 11 | 9.6994      | 46.5453    | 0.34                         | 38                         | A12i-3/E35-26                 | RGI60-11.01503 |
| 12 | 8.4188      | 46.5504    | 0.57                         | 64                         | B44-3                         | RGI60-11.01492 |
| 13 | 9.7638      | 46.4926    | 0.13                         | 9                          | E33-1                         | RGI60-11.01732 |
| 14 | 7.7746      | 46.4395    | 0.56                         | 15                         | B30-15/A55b-32/B30-12         | RGI60-11.01891 |
| 15 | 7.96        | 46.4384    | 0.54                         | 14                         | B36-11                        | RGI60-11.01906 |
| 16 | 9.8247      | 46.408     | 0.47                         | 60                         | E23-16                        | RGI60-11.02024 |
| 17 | 7.572       | 46.4122    | 0.68                         | 62                         | A55c-14/A55c-26               | RGI60-11.01971 |
| 18 | 7.5596      | 46.4141    | 0.05                         | 4                          | A55f-1/A55d-8/A55c-25         | RGI60-11.01943 |
| 19 | 7.5538      | 46.4124    | 0.13                         | 5                          | A55f-1/A55d-8/A55c-25/A55c-13 | RGI60-11.01943 |
| 20 | 7.5248      | 46.4072    | 0.55                         | 39                         | A55f-1/A55f-7/A55c-13         | RGI60-11.02000 |
| 21 | 7.544       | 46.3824    | 0.41                         | 34                         | A55f-3/B24-4                  | RGI60-11.02072 |
| 22 | 7.4817      | 46.3798    | 0.37                         | 10                         | A55f-3/B23-9                  | RGI60-11.02131 |
| 23 | 9.6232      | 46.2897    | 0.06                         | 3                          | C85-6/C84-17                  | RGI60-11.02332 |
| 24 | 8.0793      | 46.2415    | 0.34                         | 18                         | C05-2/B47-20/C04-2            | RGI60-11.02385 |
| 25 | 8.0255      | 46.1746    | 0.64                         | 36                         | C02-2                         | RGI60-11.02458 |
| 26 | 8.024       | 46.1637    | 0.4                          | 14                         | C01-10                        | RGI60-11.02478 |
| 27 | 7.8808      | 46.1013    | 0.44                         | 5                          | B53-4                         | RGI60-11.02583 |
| 28 | 7.8463      | 46.0755    | 0.55                         | 44                         | B55-12                        | RGI60-11.02643 |
| 29 | 7.4414      | 46.0619    | 0.58                         | 10                         | B73-24                        | RGI60-11.02663 |
| 30 | 7.6027      | 46.058     | 0.47                         | 15                         | B64-2/B63-23/B72-6            | RGI60-11.02584 |
| 31 | 7.52        | 46.0474    | 0.16                         | 45                         | B73-1                         | NA             |
| 32 | 7.8692      | 46.0176    | 0.35                         | 3                          | B55-19/B56-1                  | RGI60-11.02742 |
| 33 | 7.3276      | 46.0796    | 0.51                         | 19                         | B75-7                         | RGI60-11.02620 |
| 34 | 7.3818      | 46.3686    | 0.46                         | 59                         | A56d-1/B23-3/A55f-11          | RGI60-11.02168 |
| 35 | 9.8924      | 46.6353    | 0.27                         | 6                          | A12e-4/E42-17                 | RGI60-11.01260 |
| 36 | 9.9343      | 46.6935    | 0.2                          | 14                         | E42-8                         | RGI60-11.01182 |
| 37 | 11.1017     | 46.9769    | 0.47                         | 25                         | 2039/2037/2036                | RGI60-11.00518 |
| 38 | 11.1013     | 47.0229    | 0.58                         | 2                          | 2019                          | RGI60-11.00457 |
| 39 | 8.8363      | 46.8386    | 1.51                         | 103                        | A51c-2/A51d-10                | RGI60-11.00865 |
| 40 | 8.8114      | 46.8219    | 0.99                         | 87                         | A51d-7                        | RGI60-11.00906 |

|    |         |         |      |     |                                |                |
|----|---------|---------|------|-----|--------------------------------|----------------|
| 41 | 8.8874  | 46.8172 | 0.92 | 10  | A51d-10/A50i-18                | RGI60-11.00872 |
| 42 | 8.7448  | 46.8056 | 0.88 | 50  | A51d-4                         | RGI60-11.00954 |
| 43 | 8.9495  | 46.793  | 0.93 | 100 | A14m-9                         | RGI60-11.00979 |
| 44 | 8.423   | 46.775  | 0.83 | 13  | A51h-15/A51h-25                | RGI60-11.01019 |
| 45 | 8.9118  | 46.6273 | 1.58 | 66  | A14f-15/A14g-2/C42-3           | RGI60-11.01280 |
| 46 | 8.1785  | 46.6372 | 1.02 | 5   | A54j-2/A54i-22/A54i-10/A54i-7  | RGI60-11.01257 |
| 47 | 8.8862  | 46.6179 | 1.56 | 40  | A14g-2                         | RGI60-11.01293 |
| 48 | 7.8045  | 46.4552 | 1.35 | 163 | A55b-13/B30-18/B30-16/B30-15   | RGI60-11.01702 |
| 49 | 8.0188  | 46.437  | 1.09 | 23  | B36-18                         | RGI60-11.01902 |
| 50 | 7.5409  | 46.4169 | 1.17 | 94  | A55f-1/A55d-8/A55c-25/A55f-7   | RGI60-11.01943 |
| 51 | 7.3445  | 46.3533 | 1.17 | 63  | A56d-4                         | RGI60-11.02191 |
| 52 | 7.3692  | 46.3535 | 1.06 | 82  | A56d-1/B23-3                   | RGI60-11.02168 |
| 53 | 7.3233  | 46.349  | 0.83 | 43  | A56d-5                         | RGI60-11.02207 |
| 54 | 9.6783  | 46.3187 | 0.98 | 97  | C84-9                          | RGI60-11.02268 |
| 55 | 9.6678  | 46.3096 | 1.56 | 116 | C84-13/C84-14                  | RGI60-11.02245 |
| 56 | 6.9383  | 46.1665 | 0.74 | 4   | B93-6                          | RGI60-11.02448 |
| 57 | 8.0163  | 46.158  | 0.77 | 33  | B51-9/C01-9                    | RGI60-11.02474 |
| 58 | 8.0161  | 46.1443 | 0.94 | 45  | C01-7                          | RGI60-11.02512 |
| 59 | 7.8894  | 46.1295 | 1.33 | 9   | B54-3/B53-8                    | RGI60-11.02495 |
| 60 | 7.6967  | 46.0972 | 1.56 | 38  | B62-8                          | RGI60-11.02580 |
| 61 | 7.7159  | 46.0878 | 1.48 | 157 | B58-4/B58-30/B62-9             | RGI60-11.02594 |
| 62 | 7.3588  | 46.0699 | 1.22 | 70  | B74-18/B75-6                   | RGI60-11.02634 |
| 63 | 7.7069  | 46.0545 | 1.07 | 70  | B58-2/B57-19                   | RGI60-11.02645 |
| 64 | 7.8628  | 46.052  | 1.19 | 57  | B53-4/B55-16/B55-17            | RGI60-11.02624 |
| 65 | 7.3982  | 46.0096 | 0.88 | 48  | B74-9                          | RGI60-11.02760 |
| 66 | 7.0527  | 45.9966 | 1.55 | 76  | B90-2/B85-23                   | RGI60-11.02740 |
| 67 | 7.8334  | 45.9549 | 1.75 | 24  | B56-7                          | RGI60-11.02822 |
| 68 | 9.2487  | 46.9091 | 0.87 | 70  | A15b-4/A14p-3                  | RGI60-11.00689 |
| 69 | 9.9523  | 46.6885 | 0.93 | 34  | E42-10                         | RGI60-11.01173 |
| 70 | 9.7053  | 46.5279 | 1.06 | 85  | E35-17                         | RGI60-11.01549 |
| 71 | 9.038   | 46.5066 | 1.4  | 41  | A14d-17/A13n-14/C44-2/A13n-6   | RGI60-11.01635 |
| 72 | 8.0377  | 46.1078 | 1.35 | 57  | C00-8/C00-7                    | RGI60-11.02575 |
| 73 | 7.3081  | 46.0854 | 1.12 | 331 | B82-1/B75-12                   | RGI60-11.02600 |
| 74 | 10.9161 | 46.9286 | 1.58 | 25  | 14007/2150                     | RGI60-11.00648 |
| 75 | 11.0675 | 46.8278 | 1.38 | 29  | 2060                           | RGI60-11.00836 |
| 76 | 10.7836 | 46.8819 | 0.82 | 9   | 7020/2133                      | RGI60-11.00698 |
| 77 | 8.8684  | 46.8524 | 1.85 | 132 | A50j-6/A50j-3                  | RGI60-11.00826 |
| 78 | 8.9346  | 46.8069 | 2.89 | 235 | A50i-12/A50i-13                | RGI60-11.00931 |
| 79 | 8.4363  | 46.7621 | 1.91 | 106 | A54e-6/A54e-30/A51f-43/A54e-10 | RGI60-11.01067 |
| 80 | 8.789   | 46.7375 | 3.02 | 154 | A51d-18/A51d-16/A51d-15/A14j-4 | RGI60-11.01104 |
| 81 | 8.8998  | 46.6188 | 2.18 | 92  | A14g-2/C42-2                   | RGI60-11.01280 |
| 82 | 8.4328  | 46.6118 | 3.2  | 201 | A51e-37                        | RGI60-11.01296 |
| 83 | 7.9893  | 46.5671 | 2.13 | 74  | A54l-19/A54m-3/A54m-64         | RGI60-11.01346 |
| 84 | 8.2033  | 46.5148 | 2.83 | 194 | B41-7/B41-5                    | RGI60-11.01576 |
| 85 | 7.8669  | 46.4881 | 3.42 | 129 | A54m-21/A54m-19/A54m-16/B30-22 | RGI60-11.01622 |
| 86 | 9.8173  | 46.359  | 2.53 | 138 | E25-4/E25-6                    | RGI60-11.02195 |
| 87 | 9.771   | 46.3439 | 2.57 | 111 | E26-1                          | RGI60-11.02208 |



|     |         |         |       |      |                                                                                                                                                        |                |
|-----|---------|---------|-------|------|--------------------------------------------------------------------------------------------------------------------------------------------------------|----------------|
| 88  | 9.6436  | 46.3015 | 3.76  | 166  | C84-16                                                                                                                                                 | RGI60-11.02285 |
| 89  | 7.2281  | 46.3197 | 3.81  | 363  | B16-1/B22-1/B16-9/B21-5                                                                                                                                | RGI60-11.02244 |
| 90  | 8.0986  | 46.2402 | 3.04  | 139  | C05-2/B47-20                                                                                                                                           | RGI60-11.02385 |
| 91  | 8.0087  | 46.1801 | 1.98  | 40   | C02-4/B51-5/B51-9                                                                                                                                      | RGI60-11.02442 |
| 92  | 7.88    | 46.1482 | 2.25  | 21   | B53-11/B53-10                                                                                                                                          | RGI60-11.02496 |
| 93  | 8.0297  | 46.1343 | 2.34  | 190  | C01-4                                                                                                                                                  | RGI60-11.02529 |
| 94  | 7.8826  | 46.1133 | 1.97  | 38   | B54-3/B53-7                                                                                                                                            | RGI60-11.02495 |
| 95  | 7.6919  | 46.1106 | 2.04  | 128  | B62-7                                                                                                                                                  | RGI60-11.02570 |
| 96  | 7.3428  | 46.0704 | 1.89  | 51   | B74-18/B75-6                                                                                                                                           | RGI60-11.02640 |
| 97  | 7.6906  | 46.0477 | 2.46  | 137  | B57-16                                                                                                                                                 | RGI60-11.02676 |
| 98  | 7.6422  | 46.0218 | 2.54  | 155  | B57-10/B63-5/B57-11                                                                                                                                    | RGI60-11.02630 |
| 99  | 7.8577  | 46.0227 | 2.2   | 139  | B55-19/B56-1/B56-19                                                                                                                                    | RGI60-11.02742 |
| 100 | 7.3853  | 46.017  | 1.91  | 49   | B74-11                                                                                                                                                 | RGI60-11.02743 |
| 101 | 7.4494  | 45.9978 | 3.2   | 283  | B74-8/B73-16/B73-34/B82-19/B82-27/B73-33                                                                                                               | RGI60-11.02749 |
| 102 | 7.7107  | 45.9616 | 3.38  | 180  | B56-31/B56-30/B56-7                                                                                                                                    | RGI60-11.02819 |
| 103 | 7.0524  | 45.9338 | 2.38  | 35   | B85-8/B85-7/B85-4                                                                                                                                      | RGI60-11.02884 |
| 104 | 9.8806  | 46.6289 | 2.35  | 144  | A12e-4/E42-17                                                                                                                                          | RGI60-11.01260 |
| 105 | 13.3362 | 47.0191 | 3.14  | 119  | 21011                                                                                                                                                  | RGI60-11.00303 |
| 106 | 12.6513 | 47.1103 | 2.26  | 66   | 5094                                                                                                                                                   | RGI60-11.00124 |
| 107 | 12.683  | 47.1963 | 1.88  | 46   | 5080/5081                                                                                                                                              | RGI60-11.00014 |
| 108 | 12.5989 | 47.1315 | 1.76  | 70   | 6092/5097                                                                                                                                              | RGI60-11.00080 |
| 109 | 11.0197 | 46.7846 | 3.62  | 39   | 2072/2074                                                                                                                                              | RGI60-11.00887 |
| 110 | 11.0484 | 46.8153 | 3.18  | 40   | 2068/2062/2063                                                                                                                                         | RGI60-11.00871 |
| 111 | 9.6978  | 47.0591 | 2.19  | 11   | 12029                                                                                                                                                  | RGI60-11.00403 |
| 112 | 10.1299 | 46.8537 | 2.28  | 34   | 12007/13019                                                                                                                                            | RGI60-11.00781 |
| 113 | 12.3783 | 47.0839 | 3.52  | 28   | 6066/6054/6053/6077                                                                                                                                    | RGI60-11.00135 |
| 114 | 11.7921 | 47.0008 | 3.9   | 24   | 9076/9075/9078                                                                                                                                         | RGI60-11.00459 |
| 115 | 8.0435  | 46.572  | 11.3  | 305  | A54l-19/A54l-38/A54l-32/A54m-3/B36-26/A54l-31                                                                                                          | RGI60-11.01346 |
| 116 | 8.0213  | 46.5003 | 86.62 | 3376 | A54l-19/A54m-5/B36-26/A54m-3/A54l-17/A54m-27/A54m-26/A54m-11/A54m-12/A54m-37/A54m-39/B36-28/B31-4/B36-48/B31-20/B36-25/B36-21/B31-6/B36-46/B36-1/B40-7 | RGI60-11.01346 |
| 117 | 8.1995  | 46.5319 | 5.18  | 759  | A54g-10/A54g-3/A54g-11/B40-7                                                                                                                           | RGI60-11.01478 |
| 118 | 7.8366  | 46.4941 | 6.19  | 258  | A54m-21/A54m-19/A55b-13                                                                                                                                | RGI60-11.01622 |
| 119 | 7.802   | 46.4748 | 13.76 | 868  | A54m-21/A55b-13/B30-18/B30-16/A55b-30/B30-15                                                                                                           | RGI60-11.01622 |
| 120 | 8.0177  | 46.4583 | 8.31  | 268  | B36-26/B36-21/B36-46                                                                                                                                   | RGI60-11.01450 |
| 121 | 8.3333  | 46.4397 | 6.43  | 269  | B45-4/B45-35                                                                                                                                           | RGI60-11.01876 |
| 122 | 9.9425  | 46.3937 | 16.84 | 848  | E22-3/E22-5                                                                                                                                            | RGI60-11.01946 |
| 123 | 9.848   | 46.3744 | 8.78  | 333  | E23-11/E23-12/E23-9                                                                                                                                    | RGI60-11.02119 |
| 124 | 9.9797  | 46.3682 | 6.63  | 355  | C93-4/C93-1                                                                                                                                            | RGI60-11.02144 |
| 125 | 7.8682  | 46.3978 | 4.84  | 239  | B32-2/B34-2/B32-11/B32-5/B32-6                                                                                                                         | RGI60-11.01985 |
| 126 | 7.8588  | 46.1303 | 8.31  | 147  | B54-3/B53-8/B55-27/B53-7/B55-3                                                                                                                         | RGI60-11.02495 |
| 127 | 7.6956  | 46.1313 | 5.99  | 343  | B60-9/B62-28/B58-8                                                                                                                                     | RGI60-11.02490 |
| 128 | 7.719   | 46.1346 | 6.75  | 267  | B60-9/B58-8                                                                                                                                            | RGI60-11.02490 |
| 129 | 7.5958  | 46.0776 | 5.77  | 517  | B64-2/B63-21/B63-22/B63-23/B72-6                                                                                                                       | RGI60-11.02584 |
| 130 | 7.8885  | 46.0731 | 16.61 | 303  | B53-4/B55-12/B55-11/B52-33/B52-32/B55-16/B55-17/B55-18                                                                                                 | RGI60-11.02596 |

|     |         |         |       |      |                                                             |                |
|-----|---------|---------|-------|------|-------------------------------------------------------------|----------------|
| 131 | 7.7177  | 46.0657 | 5.51  | 301  | B62-10/B58-2/B58-26/B57-19                                  | RGI60-11.02593 |
| 132 | 7.911   | 46.0344 | 9.98  | 688  | B52-29/B55-18/B52-27/B52-26/B56-3                           | RGI60-11.02704 |
| 133 | 7.0267  | 45.9978 | 6.4   | 84   | B90-2/B90-4/B85-23                                          | RGI60-11.02740 |
| 134 | 7.4887  | 45.9754 | 6.18  | 318  | B73-14/B82-27/B73-12                                        | RGI60-11.02787 |
| 135 | 7.0405  | 45.9692 | 7.76  | 135  | B85-16/B85-17/B85-13/B85-8                                  | RGI60-11.02793 |
| 136 | 7.324   | 45.9243 | 7.62  | 355  | B82-39/B82-36/B84-11                                        | RGI60-11.02889 |
| 137 | 8.3731  | 46.6616 | 17.18 | 1211 | A54e-25/A54f-5/A54e-24/B43-3/A54f-6/A54f-7                  | RGI60-11.01198 |
| 138 | 8.176   | 46.6095 | 13.76 | 1166 | A54j-2/A54i-3/A54i-4/A54i-5                                 | RGI60-11.01222 |
| 139 | 8.1681  | 46.5661 | 27.15 | 1924 | A54l-4/A54g-47/A54g-10/A54g-3/A54g-49/A54g-11/A54l-31/B40-7 | RGI60-11.01270 |
| 140 | 7.6458  | 46.0522 | 15.7  | 783  | B62-10/B63-16/B63-17/B63-15/B57-24/B57-10/B63-5             | RGI60-11.02593 |
| 141 | 7.6169  | 45.9918 | 16.85 | 776  | B72-15/B72-11/B57-5                                         | RGI60-11.02709 |
| 142 | 10.9436 | 46.7835 | 8.46  | 87   | 2108/2107/2110/2074                                         | RGI60-11.00945 |
| 143 | 10.8222 | 46.7871 | 7.93  | 118  | 2121                                                        | RGI60-11.00919 |
| 144 | 10.8931 | 46.7767 | 5.38  | 44   | 2111/2107/2110                                              | RGI60-11.00945 |
| 145 | 10.8914 | 46.9074 | 11.05 | 127  | 2136/14010/14008/14014                                      | RGI60-11.00663 |
| 146 | 10.8188 | 46.8756 | 9.6   | 55   | 2135/14016/7020/2133/14015/14014                            | RGI60-11.00687 |
| 147 | 11.0796 | 46.9989 | 4.16  | 48   | 2034/3036/2022/2036                                         | RGI60-11.00487 |
| 148 | 12.245  | 47.0557 | 5.2   | 101  | 6041/6043/6039/6040/6045/5141                               | RGI60-11.00264 |
| 149 | 12.3838 | 47.1074 | 9.68  | 64   | 6066/6054/6053/6077/6078/5123                               | RGI60-11.00068 |
| 150 | 12.3097 | 47.111  | 12.16 | 107  | 6048/5141/6052/5129/5123                                    | RGI60-11.00068 |
| 151 | 12.3463 | 47.1317 | 3.96  | 56   | 6053/6077/5129/6078/5124/5123                               | RGI60-11.00068 |
| 152 | 11.6642 | 47.067  | 4.17  | 88   | 3002/9097/9099/9109/9110                                    | RGI60-11.00311 |

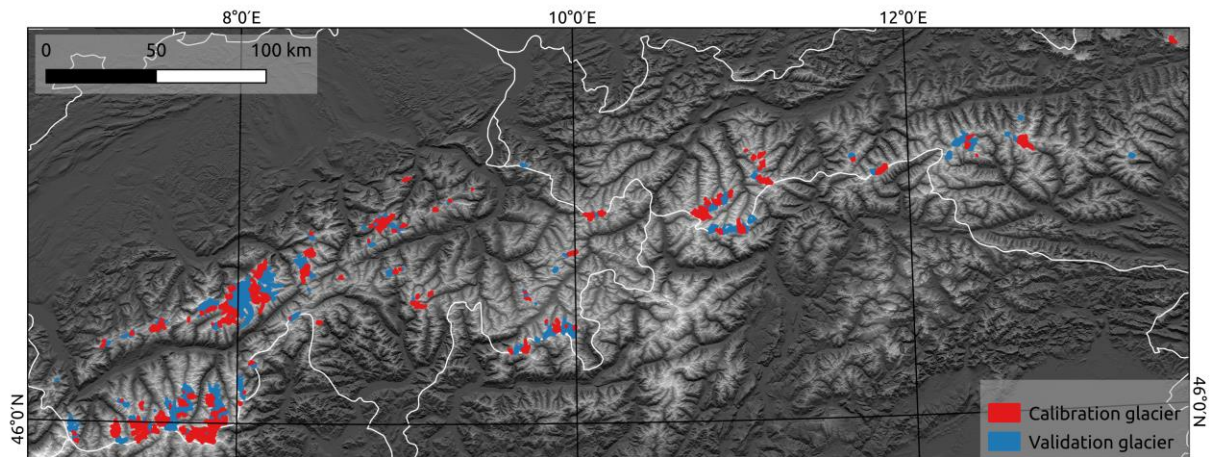

Figure S 1 Spatial distribution of glaciers with in-situ thickness observations in the Swiss and Austrian Alps, red outlines indicate glaciers used for calibrating the viscosity scaling factors. Thickness observations of glaciers with blue outlines are used to validate the ice thickness distribution of the different reconstruction setups.

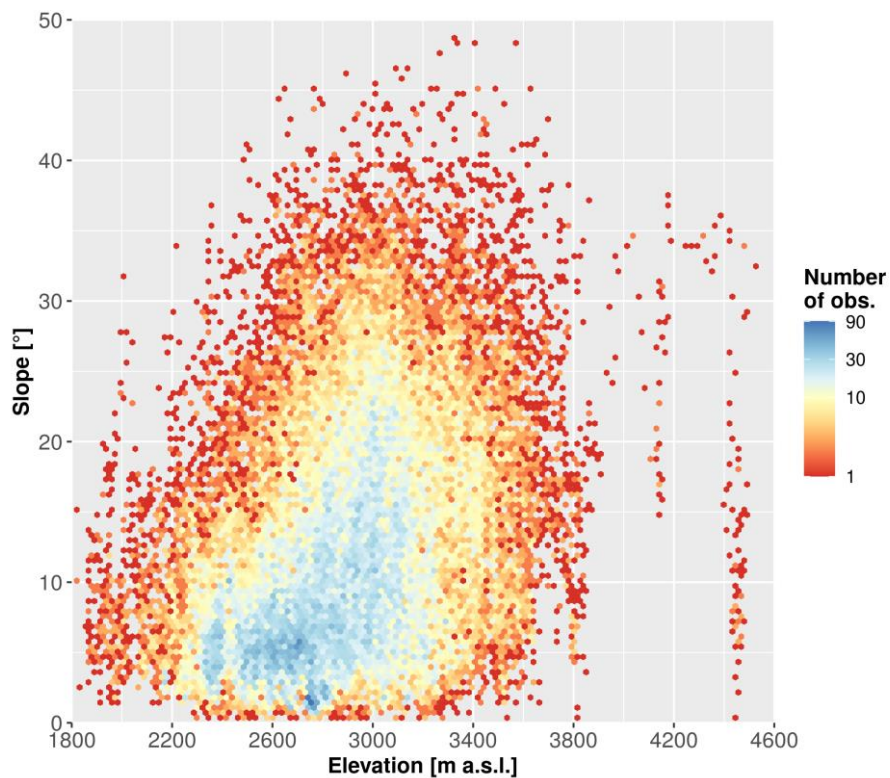

Figure S 2 Topographic distribution of all in-situ thickness observations (GlaThiDa Consortium, 2020; Grab et al., 2021) used in this study.

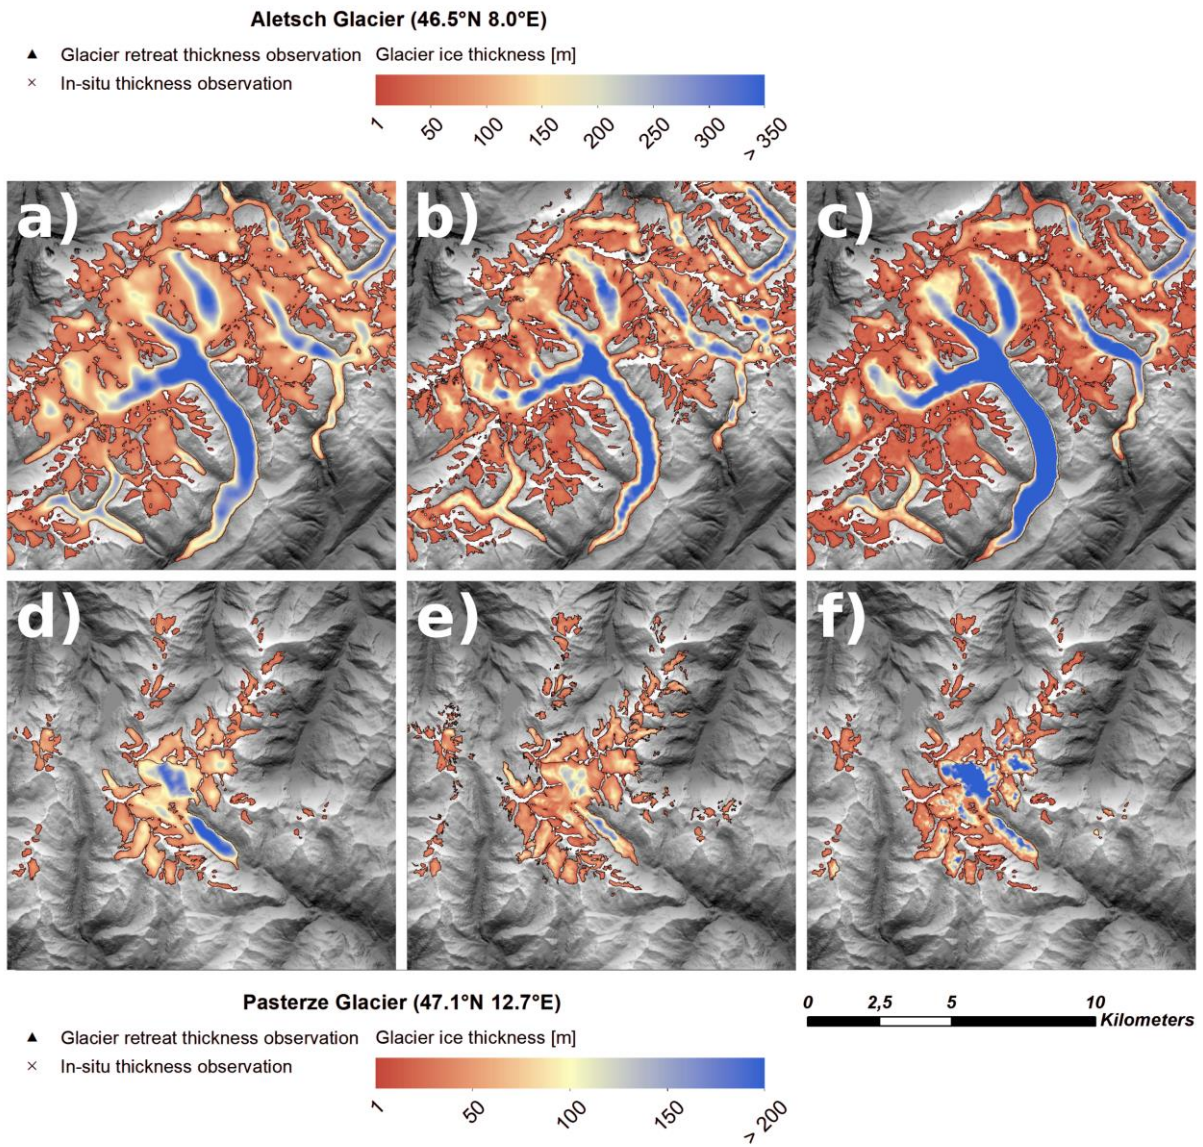

Figure S 3 Reference maps of ice thickness distribution from previous publications of Aletsch (a-c) & Pasterze (d-f) glaciers: (a,d) Farinotti et al. (2019); (b) Grab et al. (2021); (c,f) Millan et al. (2022) & (e) Helfricht et al. (2019).

## **References**

Farinotti, D., Huss, M., Fürst, J. J., Landmann, J., Machguth, H., Maussion, F., and Pandit, A.: A consensus estimate for the ice thickness distribution of all glaciers on Earth, *Nat. Geosci.*, 12, 168–173, <https://doi.org/10.1038/s41561-019-0300-3>, 2019.

GlaThiDa Consortium: Glacier Thickness Database 3.1.0., World Glacier Monitoring Service, Zurich, Switzerland, 2020.

Grab, M., Mattea, E., Bauder, A., Huss, M., Rabenstein, L., Hodel, E., Linsbauer, A., Langhammer, L., Schmid, L., Church, G., Hellmann, S., Déléze, K., Schaer, P., Lathion, P., Farinotti, D., and Maurer, H.: Ice thickness distribution of all Swiss glaciers based on extended ground-penetrating radar data and glaciological modeling, *J. Glaciol.*, 67, 1074–1092, <https://doi.org/10.1017/jog.2021.55>, 2021.

Helfricht, K., Huss, M., Fischer, A., and Otto, J.-C.: Calibrated Ice Thickness Estimate for All Glaciers in Austria, *Front. Earth Sci.*, 7, 68, <https://doi.org/10.3389/feart.2019.00068>, 2019.

Maisch, M., Wipf, A., Denneler, B., Battaglia, J., and Benz, C.: Die Gletscher der Schweizer Alpen: Gletscherhochstand 1850, Aktuelle Vergletscherung, Gletscherschwund-Szenarien. (Schlussbericht NFP 31), 2nd ed., vdf Hochschulverlag an der ETH, Zürich, 373 pp., 2000.

Millan, R., Mougnot, J., Rabatel, A., and Morlighem, M.: Ice velocity and thickness of the world's glaciers, *Nat. Geosci.*, 15, 124–129, <https://doi.org/10.1038/s41561-021-00885-z>, 2022.

Müller, F., Calfisch, T., and Müller, G.: Firn und Eis der Schweizer Alpen (Gletscherinventar), Geographisches Institut, ETH, Zürich, 1976.

Patzelt, G.: The Austrian glacier inventory: status and first results, IAHS-AISH Publ., 1980.

Pfeffer, W. T., Arendt, A. A., Bliss, A., Bolch, T., Cogley, J. G., Gardner, A. S., Hagen, J.-O., Hock, R., Kaser, G., Kienholz, C., Miles, E. S., Moholdt, G., Mölg, N., Paul, F., Radić, V., Rastner, P., Raup, B. H., Rich, J., Sharp, M. J., and The Randolph Consortium: The Randolph Glacier Inventory: a globally complete inventory of glaciers, *J. Glaciol.*, 60, 537–552, <https://doi.org/10.3189/2014JoG13J176>, 2014.
